1 **“Someone who hates themselves doesn’t come for their drugs”:** Experiences of Mental  
2 **Health Along the HIV Care Continuum in South-Central, Uganda**

3  
4 **Authors**

5  
6 Nora S. West<sup>1</sup>, William Ddaaki<sup>2</sup>, Sarah M. Murray<sup>3</sup>, Neema Nakyanjo<sup>2</sup>, Dauda Isabirye<sup>2</sup>, Rosette  
7 Nakubulwa<sup>2</sup>, Fred Nalugoda<sup>2</sup>, Pamela J. Surkan<sup>4</sup>, Heidi E. Hutton<sup>5</sup>, Caitlin E. Kennedy<sup>4</sup>

8  
9 <sup>1</sup> Division of Pulmonary and Critical Care Medicine, University of California San Francisco, San Francisco CA USA

10 <sup>2</sup> Rakai Health Sciences Program, Kalisizo, Uganda

11 <sup>3</sup> Department of Mental Health, Johns Hopkins Bloomberg School of Public Health, Baltimore, MD, USA

12 <sup>4</sup> Department of International Health, Social and Behavioral Interventions Program, Johns Hopkins Bloomberg School of Public  
13 Health, Baltimore, MD, USA

14 <sup>5</sup> Division of Psychiatry and Behavioral Sciences, Johns Hopkins School of Medicine, Baltimore, MD, USA

15  
16 **Corresponding Author:** Nora S. West

17  
18 **Running title:** Mental Health Along the HIV Care Continuum

19  
20 **Key words:** HIV, mental health, qualitative research, continuum of care, Africa

21  
22 **Word count:** 4103

23  
24 **ABSTRACT**

25  
26 Introduction: Poor mental health occurs more frequently among people living with HIV.  
27 Understanding what mental health problems occur and at what point during the continuum of  
28 HIV care is critical to ensure these problems are identified and appropriately addressed. We  
29 explored how mental health is experienced along the HIV care continuum in Rakai, Uganda.  
30 Methods: We conducted qualitative semi-structured in-depth interviews with 20 adults living with  
31 HIV and 10 health workers from March to December 2020. Interviews followed a timeline  
32 approach. Responses were analyzed using content analysis.  
33 Results: At the time of HIV diagnosis, nearly all participants described a range of strong  
34 emotions, including shock, fear and intense worry. Most participants described continued fear  
35 and intense worry leading up to, and at the time of, ART initiation. However, they said these  
36 emotions often subside after ART is initiated and viral suppression is achieved. Across  
37 interviews and at multiple points of the continuum, participants discussed how fear and worry  
38 led individuals to be “thinking too much” or be in “deep thoughts” and experience self-hatred.  
39 Individuals who stopped taking ART were thought to have more severe mental health problems  
40 (“madness”, psychosis, suicidality). Participants were divided about the mental health of  
41 persons who returned to care after disengagement.  
42 Conclusion: In this setting, mental health problems experienced by people living with HIV are  
43 dynamic across the care continuum. With expanded HIV testing campaigns and Universal Test  
44 and Treat policies, targeted interventions for psychosocial support at the time of testing and  
45 ART initiation remain critical.

46

47        **INTRODUCTION**

48

49        HIV persists as a leading cause of death in sub-Saharan Africa (SSA) [1], highlighting a  
50 continued urgent need to address the factors that contribute to poor outcomes for people living  
51 with HIV [2]. HIV prevalence in Uganda is 5.9% nationally [3] but significantly higher in the  
52 predominantly rural Rakai region where median prevalence ranges from 14% in agrarian  
53 communities to 42% in fishing communities [4, 5]. Explanations for this markedly elevated HIV  
54 prevalence are multifactorial, and include high levels of in and out cross-community migration in  
55 the Rakai region, a historical lack of targeted HIV testing and treatment services and service  
56 uptake in the region, and the presence of fishing and trading communities where individuals with  
57 high levels of HIV-related sexual risk behaviors are more likely to reside [4, 6]. There remains a  
58 pressing need to both effectively manage the health of people already living with HIV and  
59 prevent new infections in the Rakai setting.

60        The HIV care continuum is an HIV care and treatment framework that depicts the often bi-  
61 [7]directional spectrum from HIV diagnosis, linkage to care, retention in care, and viral  
62 suppression [8]. In the modern treatment era of Universal Test and Treat (UTT) all newly HIV  
63 diagnosed individuals are eligible for ART regardless of CD4 count. Hance et al. have further  
64 conceptualized the linkage to care step as a multifaceted stage of the continuum, inclusive of  
65 post-test counselling, care transfer, clinical assessment, ART initiation, counselling and support,  
66 and first follow-up – suggesting it is not as brief or simple a step as it might appear [9].

67        Evidence from SSA demonstrates that poor mental health, inclusive of symptoms or  
68 diagnosis of a mental disorder or disorders, occurs more frequently among people living with  
69 HIV than the general population [10-13]. In addition to being common, poor mental health and  
70 psychological distress among people living with HIV often go unrecognized and have  
71 deleterious impacts on further HIV transmission and treatment outcomes [14]. Beyond the  
72 impact on general wellbeing for people living with HIV, poor mental health and HIV-related

73 stigma are linked to engagement in risk behaviors including delayed care seeking, decreased  
74 medication adherence, and poor retention in care among people living with HIV in low- and  
75 middle-income countries (LMICs) [10, 11, 13, 15-22]. Despite this important evidence, a clear  
76 picture of both the types of poor mental health that occur and the mental health trajectories  
77 within and across the continuum in the modern treatment era (i.e. since the adoption of UTT  
78 policies) is lacking. UTT critically ensures that all people living with HIV can access lifesaving  
79 treatment. However, there is evidence that individuals initiated immediately after HIV diagnosis  
80 (i.e. same day) may have worse treatment outcomes than individuals who are initiated slightly  
81 later (i.e. within 2 weeks following diagnosis), suggesting there may be nuance in the time and  
82 support individuals need following HIV diagnosis [23, 24]. In the SSA setting of readily available  
83 and rapidly initiated ART, the impact of mental health on achieving favorable HIV treatment  
84 outcomes is still largely unknown. Further, studies from SSA in the UTT-era typically explore  
85 mental health at just one or two steps of the continuum, and often focus only on symptoms of a  
86 singular disorder (primarily depression) [25]. This evidence gap needs to be addressed.  
87 Additionally, understanding the timing and spectrum of mental health problems, and how they  
88 may wax and wane along the HIV care continuum, is important for developing tailored and  
89 timely interventions. This comprehensive understanding of mental health along the HIV care  
90 continuum may be critical to achieving optimal mental health and HIV treatment outcomes and  
91 is absent in the literature from SSA. We used qualitative research to explore how mental health  
92 is experienced along the HIV care continuum in Rakai, Uganda.

## 93 **MATERIALS AND METHODS**

### 94 *Theoretical Frameworks*

95 This research was influenced by the ethnomedical theoretical perspective. Central to this theory  
96 is that health, illness, and individuals' perceptions of health and illness are embedded in social  
97 and cultural contexts [26]. This theoretical perspective guides the exploration of local

98 experiences, terms, practices, and models related to mental health, as well as the pertinent  
99 connections between mind and body. Furthermore, it emphasizes that insights gained from  
100 research employing this theoretical framework can enhance future health research and  
101 programming [26]. In addition, the design of the interviews drew upon journey mapping, a health  
102 research approach used to linearly describe an individual's path, often a person with an illness,  
103 to elucidate meaningful patterns along the path – in this case, along the HIV care continuum  
104 [27].

105

### 106 *Study Setting and Population*

107

108 From March 2020 to December 2020, we conducted semi-structured in-depth interviews  
109 (IDIs) with people living with HIV and health workers in Rakai, south-central Uganda. Adults  
110 living with HIV (ages 18-49) were recruited from participants in recent rounds of the Rakai  
111 Community Cohort Study (RCCS), an open ongoing population-based cohort study across 40  
112 predominantly rural communities in the Rakai region, who had previously agreed to be  
113 recontacted for future studies [4]. Briefly, the 40 study communities, selected to be  
114 representative of the Rakai region, undergo a census roughly ever 1-2 years where all  
115 households within the community clusters are systematically approached and enumerated [4].  
116 Following the census, the RCCS enrolls eligible participants in central community locations, with  
117 follow-up visits to households that do not present in attempts to enroll all households in the  
118 enumerated community cluster. Participation in the RCCS is high, with up to 99% of eligible  
119 individuals participating in previous data collection rounds [4]. Full details of the RCCS design  
120 and methods are published elsewhere [4, 28].

121

122 We purposively sampled participants for our study to achieve balance in time since HIV  
123 diagnosis, based on available data from the RCCS (diagnosis  $\leq 18$  months or  $>18$  months ago),

124 and gender. Sampling on these characteristics was chosen to allow for the exploration of  
125 similarities and differences in psychological distress across these different dimensions and at  
126 different time points in the HIV care continuum. Health workers who regularly provide care to  
127 people living with HIV and who were employed by any of the three Rakai Health Sciences  
128 Program (RHSP)-affiliated clinics were also eligible to participate in the study. Health workers  
129 were selected based on recommendations from RHSP staff with a focus on health workers  
130 knowledgeable about the mental health and psychosocial needs of people living with HIV.

131

### 132 *Procedures*

133

134 Among individuals recruited for the study, two people living with HIV declined  
135 participation due to inability to commit the time needed for the interview. The majority of IDIs  
136 were conducted in Luganda by experienced RHSP qualitative data collectors, including authors  
137 R.N. and D.I.. Four IDIs with health workers were conducted in English by author N.S.W.. All  
138 participants provided informed consent. Four interviews were conducted in-person in March  
139 2020 among people living with HIV, while all subsequent interviews were carried out via  
140 telephone due to COVID-19 pandemic lockdown restrictions. Participants who completed in-  
141 person interviews provided written consent while participants who completed telephone  
142 interviews provided oral consent. All IDIs were completed at a single timepoint and lasted from  
143 45-90 minutes.

144

145 Semi-structured interview guides (Appendix 1) were used and followed a timeline  
146 representing the HIV care continuum, starting from before HIV diagnosis and moving through  
147 retention in care. Participants were asked about the experiences of people living with HIV in  
148 their community, and not about their personal experiences. Specifically, they were asked about  
149 the problems related to emotions, feelings, thinking, or mental health that people who have HIV

150 might experience at each step along the timeline. Interview guide questions were developed by  
151 the research team based on research objectives and theory and adapted from pre-existing  
152 questions piloted and utilized in other studies when applicable. Interview guide questions were  
153 designed to elicit descriptions of mental health and/or distress along the HIV care continuum  
154 without presupposition of how this might manifest or be named by participants. Thus, interview  
155 guides did not ask about specific mental disorders or types of psychological distress but used  
156 open ended questions to facilitate sharing of this information by participants. Separate questions  
157 were used to ask participants about the drivers for the type or types of poor mental or  
158 psychological distress health that participants described. Questions about the impact of the  
159 COVID-19 pandemic on the psychological wellbeing of people living with HIV were asked for all  
160 participants who had telephone interviews conducted. These methods and findings have been  
161 reported elsewhere [29]. Interview guides were developed in English and translated to Luganda  
162 by bi-lingual research team members through an initial process of translation and back  
163 translation, followed by team-based review and discussion before arriving at final Luganda and  
164 English versions of the interview guides. All interviews were audio recorded. All interviews were  
165 transcribed, and interviews conducted in Luganda were translated into English. Maximum  
166 variation sampling for qualitative research, where sample size is determined by number of  
167 factors sampled and planned sample homogeneity considered, was used to determine planned  
168 samples sizes for each participant group [30]. The principle of saturation, when new or  
169 additional data does not yield new information, was used to arrive at the final sample size [31].  
170 During data collection, study investigators met weekly with the data collection team to discuss  
171 interview progress and content, review debrief forms and notes, and available interview  
172 transcripts to assess saturation throughout data collection.

173

174 *Analysis*

175

176 Content analysis was used as the analytical approach [32]. A codebook was initially  
177 developed by N.S.W. based on the interview guide and further refined through reading and re-  
178 reading of the transcripts, initial coding, and analytic memoing. Codes and interpretations were  
179 shared with the data collection team and study investigators throughout the analysis process for  
180 input, feedback, and refinement. N.S.W. coded all transcripts using the final version of the  
181 codebook. Issues discussed in the interviews were grouped by step of the HIV care continuum  
182 and further categorized by specific stressors or mental health problems at each step. Findings  
183 were examined and compared based on sampling stratifications and participant category for the  
184 exploration of similarities and differences across these different dimensions.

185  
186 The study was approved by the Institutional Review Boards of the Johns Hopkins Bloomberg  
187 School of Public Health, The Research and Ethics Committee of the Ugandan Virus Research  
188 Institute, and the Uganda National Council on Science and Technology.

189

## 190 **RESULTS**

191

192 The sample included 20 people living with HIV (n=11 women, n=9 men; n=11 diagnosed  
193 ≤18 months ago, n=9 diagnosed >18 months ago) and 10 health workers (n=5 nurses, n=3 HIV  
194 counsellors, n=2 peer health workers). Moving along the HIV care continuum, participants  
195 described factors shaping psychological distress, mental health and resulting mental health  
196 outcomes at the different stages of the continuum. Findings are presented by stages of HIV care  
197 continuum with exemplary quotes. Figure 1 shows an overall summary of findings.



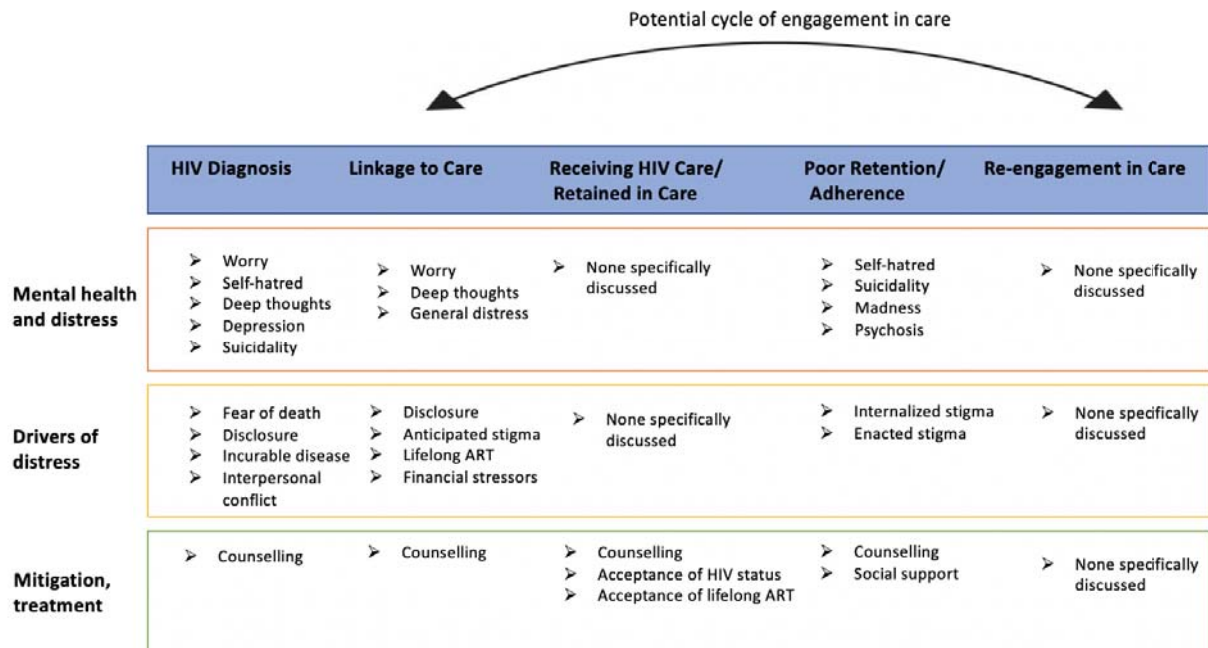

198

199 **Figure 1. Descriptors of Mental Health and Distress, Drivers of Distress, and Mitigation or**  
 200 **Treatment Approaches**

201

202 ***HIV diagnosis***

203

204 Most participants felt that prior to HIV testing, people living with HIV did not experience  
 205 mental health problems, although the stressors of daily life regardless of HIV status were always  
 206 present. At the time of diagnosis, all but one participant said that people living with HIV  
 207 experience a range of strong emotions with potential mental health impacts. Prominent  
 208 throughout most interviews at the time of HIV diagnosis was the fear of death and the idea that  
 209 HIV is a death sentence, which in turn could cause mental health issues, as described by a peer  
 210 health worker:

211

212 *If you had just provided HIV positive test results to the client, this person asks*  
 213 *him or herself what to do next, and this causes depression. It is not easy to*

214 *accept it...secondly, a person starts thinking about his or her future life, and how*  
215 *to stay alive. Thirdly, he or she will say 'nkomye' [this is the end of my life], and*  
216 *this makes an individual get worried. This person assumes that being HIV*  
217 *positive marks the end of life, and no more chances to live. As the client*  
218 *continues to cry, he or she says, 'this is the end of my life, how should I survive.'*

219  
220 Fear of death, described by most participants, was sometimes defined by causing someone  
221 to experience *okwenyamira* (translated as “deep thoughts” or “many thoughts” roughly defined  
222 as ongoing unsettling or unending thinking). Other feelings of fear could be driven by concerns  
223 about HIV disclosure and worry about not being able to care for children/family, as described by  
224 a man diagnosed with HIV ≤18 months ago: “*If someone has tested and found HIV*  
225 *positive...you get deep thoughts knowing that it is the end of your life.*” These concerns,  
226 including having to disclose one’s HIV status led to immediate distress over the idea of having  
227 to initiate ART and the tradeoffs between initiating ART or not.

228  
229 About half of participants said that self-hatred and suicidal thoughts could follow an HIV  
230 diagnosis, as many newly diagnosed individuals were reported to grapple with the idea of a  
231 lifelong disease. “*After some people are diagnosed with HIV, they start hating themselves.*  
232 *He/she might be there and starts thinking of taking poison and dying. After all, I will not be*  
233 *cured.*” (Female, diagnosed >18 months ago). Many participants, particularly those who had  
234 been diagnosed in the past 18 months, said that worry and anxiety over having to either  
235 disclose to others or conceal their HIV status was prominent at the time of diagnosis.

236  
237 ***Linkage to Care***

238

239 The majority of participants talked about how the time leading up to or at ART initiation was  
240 a period of significant distress. Reasons for this were multi-faceted, with fear about inadvertent  
241 status disclosure and stigma as prominent drivers of worry (*okweraliikirira*) and "deep thoughts"  
242 (*okwenyamira*). Anticipated stigma from family and community members because of recent  
243 HIV diagnosis in advance of ART initiation was more commonly talked about by participants  
244 more recently diagnosed with HIV, and enacted stigma was only raised by this group, as  
245 described by a woman, diagnosed with HIV  $\leq 18$  months ago:

246  
247 *A family member can see you taking HIV medicine and begins telling people that*  
248 *"so and so is taking ARVs". When you get to know that -- you begin thinking that*  
249 *wherever I go people talk/gossip about me having HIV. You begin feeling*  
250 *uncomfortable or unstable...they make them feel totally uncomfortable. This*  
251 *makes you be in deep thoughts.*

252  
253 Fear of side effects, having to take a daily pill, and worry about needing money to eat well  
254 while taking ART and to get to the clinic were other commonly mentioned by many participants  
255 as causes of distress at the time of ART initiation. Economic difficulties were discussed in  
256 general as a source of stress in all people's lives, but compounded for people living with HIV  
257 because of having to access care and eat well when on ART.

258  
259 While a few participants felt that people living with HIV may not experience any mental  
260 health issues in the time leading up to ART initiation, many described post-test counselling or  
261 on-going counselling leading up to or at the time of ART initiation as an important way of  
262 alleviating emotional distress following HIV diagnosis. *"If it is not for intensive counseling that*  
263 *organizations and government or the ministry have put in place to be given to people [recently*  
264 *diagnosed with HIV], maybe these tendencies of suicide would be many."* (HIV Counsellor)

265

266 ***Receiving HIV Care, Retention in Care, and Viral Suppression***

267

268 Overall nearly all participants felt that individuals who were receiving HIV care, adherent,  
269 and retained in care did not experience many mental health problems in large part because they  
270 had been able to receive counselling, accept their diagnosis, and come to terms with lifelong  
271 ART. When discussing mental health-related reasons that people living with HIV might stop  
272 taking ART or have trouble adhering, a number of participants said that self-hatred could be a  
273 catalyst: *“If you hate yourself [okwekyawa], even if you fetch the drugs, you are not going to*  
274 *take it because you are fed up. Someone who hates themselves doesn’t come for their drugs.”*  
275 (Female, diagnosed >18 months ago). A number of participants talked about discontinuing  
276 treatment as a death wish or akin to being suicidal. Both health workers and people living with  
277 HIV said that the downstream impact of discontinuing ART was madness or psychosis,  
278 sometimes attributed to untreated HIV-infection. *“If a person stops HIV care and treatment*  
279 *completely, it results in ‘okufa’ [death] or ‘okwagala okwetta’ [suicide attempt]. He/she first*  
280 *experiences ‘kulaluka’ [madness] and then later dies. You cannot stop HIV care and treatment*  
281 *knowing that you can only live by ARVs. ARVs are your life.”* (Female, diagnosed >18 months  
282 ago). Most participants said that people living with HIV who were experiencing mental distress  
283 and struggling with adherence and retention as a result needed counselling at the clinic and/or  
284 social support from family members and others living with HIV to mitigate these problems and  
285 described how through counselling and support people living with HIV could become “strong”  
286 and overcome distress.

287

288 When talking about people living with HIV who had been re-engaged in care, participants  
289 had mixed opinions about what mental health problems might be experienced. Some  
290 participants felt that once someone had re-engaged, they were not experiencing problems or

291 had overcome any mental health issues that would have been a barrier to re-engagement. A  
292 nurse said, *“Indeed, I do not know because I would not expect the client who had re-started*  
293 *taking ART to face any [emotional or mental health] problem. The client has already explained*  
294 *that he or she is now re-starting the HIV treatment, I do not see any likely problem this client*  
295 *would face.”* However, some participants felt that the problems experienced at the HIV  
296 diagnosis or treatment initiation timepoints might reoccur.

297

## 298 **DISCUSSION**

299

300 This qualitative study explored how people living with HIV in South-Central, Uganda  
301 experience psychological distress and poor mental health as they encounter different steps and  
302 progress along the HIV care continuum. Overall, participants felt that poor mental health was  
303 rare prior to testing and at the time of HIV testing participants described varying types of  
304 distress. Initiating ART caused worry, fear, and “deep thoughts”, with anticipated HIV-related  
305 stigma as a prominent driver. Those who struggled with adherence or dropped out of care were  
306 thought to experience self-hatred and be potentially suicidal, with possible long-term impacts of  
307 “madness” or psychosis. When people living with HIV re-engaged in care, participant responses  
308 were mixed as to whether the cycle of stressors along the continuum and their impacts on  
309 mental health would repeat upon re-starting ART.

310

311 The 95-95-95 goals have importantly led to the scale-up of HIV testing and adoption of  
312 differentiated approaches such as client or provider-initiated, community-based, or self-  
313 testing.[33] However, the relationship between mental health and HIV diagnosis is complex, with  
314 little empirical data from SSA to demonstrate whether poor mental health precedes HIV  
315 infection, leads to a delay in HIV testing, or is the result of an HIV diagnosis.[13] Our findings

316 suggest that HIV diagnosis can prompt psychological distress that may lead to poor mental  
317 health, and anticipation of a positive HIV diagnosis or fear of diagnosis may also drive distress  
318 prior to engagement in the care continuum. In our study, post-test counselling was felt to be one  
319 important way to alleviate distress following HIV-diagnosis. Client-centered post-test counselling  
320 that is tailored to the needs of a newly diagnosed individual has been recommended by the  
321 WHO, although guidance on post-test counselling content is generally focused on preparation  
322 for ART and linkage to care,[33] leaving a critical gap for addressing the potential immediate  
323 need for psychosocial support following a new HIV diagnosis which may further complicate an  
324 individual progressing to the linkage to care step. Neither recent WHO or Ugandan post-test  
325 counselling guidelines emphasize psychosocial support or assessment for mental health  
326 problems immediately following HIV diagnosis as part of post-test counselling.[33, 34]  
327 Incorporating basic psychosocial support into post-test counselling following HIV diagnosis may  
328 help mitigate distress and/or prevent worsening distress that could lead to mental health issues.  
329 Additionally, screening for poor mental health at other steps of the continuum (such as linkage-  
330 to-care) may identify individuals to prevent development of mental disorder.

331  
332 Prompt initiation of ART is important to ensure the health and wellbeing of people living  
333 with HIV and prevent onward transmission, but our findings suggest that rapid ART initiation  
334 may be accompanied by multifaceted psychological stressors that are experienced during  
335 linkage to care, supporting the idea that attention to mental health for those in need of additional  
336 support may be critical to their progression along the continuum.[14] In the era of UTT, more  
337 intensive intervention for individuals experiencing poor mental health and distress around ART  
338 initiation may be warranted to aid in progression through this critical timepoint in HIV care. Case  
339 management, often peer-led, that includes psychosocial support has been used as an approach  
340 to improve linkage to care and increase the likelihood of ART initiation.[35] Additionally, our  
341 findings demonstrate that anticipated or enacted stigma may contribute to the likelihood of

342 psychological distress at the linkage to care step. This is in line with a substantial body of  
343 literature demonstrating associations between HIV-related stigma (anticipated, enacted,  
344 internalized) and poor mental health for people living with HIV.[14, 22] In our study anticipated  
345 and enacted stigma were raised primarily by participants who were more recently diagnosed  
346 with HIV ( $\leq 18$  months ago), suggesting that individuals may be actively grappling with concerns  
347 around stigma and disclosure based on the recency of their diagnosis and therefore find these  
348 issues to be critical. Given the influential role that HIV-related stigma plays both for mental  
349 health and in HIV care and treatment outcomes for people living with HIV,[22] and that  
350 participants in this study who highlighted stigma the most were more recently diagnosed,  
351 attention to stigma early on in the continuum of care may be warranted.

352

353 The relationship between common mental disorders or symptoms of common mental  
354 disorders and adherence to ART and/or engagement in HIV care has been well studied.[14, 36-  
355 38] Our findings further support that psychological distress and poor mental health may be key  
356 contributing factors for individuals who struggle with adherence and retention in care.  
357 Participants in our study were divided on whether re-engagement in care meant an individual  
358 would not experience or was no longer experiencing poor mental health or distress, or whether  
359 having to progress again through the HIV care continuum would cause someone to experience  
360 psychological distress and potentially poor mental health outcomes all over again. Research on  
361 mental health and re-engagement in HIV care is scant. A US-based study found that people  
362 living with HIV who had a mental disorder were less likely return to care after a single HIV visit  
363 followed by a subsequent 6-month gap in care.[39] A study among people living with HIV re-  
364 engaging in care in Argentina found that 21% reported suicidal ideation in the past week.[40]  
365 We were unable to identify any literature from sub-Saharan Africa examining mental health  
366 among individuals who return to care, but our findings suggest that this may be a time when  
367 mental health stressors are renewed and psychosocial support is particularly needed.



368 Individuals re-engaging in care may benefit from more intensive mental health screening,  
369 support, and follow-up.

370  
371 Suicidal ideation and/or attempt was discussed frequently by our participants – particularly  
372 in the HIV diagnosis and linkage to care steps, and for people who had disengaged with care. A  
373 systematic review and meta-analysis of people living with HIV in Africa found prevalence of  
374 suicidal ideation to be 21.7% and a prevalence of suicide attempt of 11.1%.[41] This review did  
375 not examine timing of ideation and/or attempt, but our findings suggest these may occur across  
376 the continuum of care. Depression is associated with suicidality among people living with HIV in  
377 Africa.[42-45] While the Ugandan HIV guidelines state that annual screening for depression  
378 should occur within the healthcare setting for people living with HIV,[46] the reality of limited  
379 resources both to conduct screening and to refer people living with HIV in need of further  
380 support are likely barriers to the implementation of these guidelines. Furthermore, health  
381 workers may not be adequately trained to manage comments about suicide attempts or ideation  
382 and address them in the context of potential underlying mental disorders.

383  
384 This study is not without limitations. First, participants were not asked about their personal  
385 experiences or sampled based on mental health status or level of engagement with other  
386 people living with HIV, but rather asked to reflect generally on the experiences of people living  
387 with HIV in their communities. This limits our ability to explore lived personal experiences and  
388 trajectories along the care continuum; however, may have allowed people to speak more freely  
389 about stigmatized issues. Despite this limitation, this approach does allow for an exploration of  
390 the overall perceptions of what participants see as the issues experienced in their communities  
391 as opposed to simply an individual experience. Furthermore, a number of participants chose to  
392 share their personal experiences when providing examples of mental health challenges along  
393 the HIV care continuum. Second, data were collected in predominantly rural areas which may



394 limit transferability of the findings to urban settings. Third, interviews were restricted to  
395 individuals who agreed to be contacted for future research, and the majority were conducted via  
396 telephone, which may have limited who was able to participate based on prior consent and  
397 telephone access. However, the RCCS from which participants were drawn has procedures in  
398 place to obtain reliable telephone contact information from all cohort participants and the  
399 majority of RCCS participants agree to be contacted for studies, which may have mostly  
400 mitigated these concerns in our sample.

401

## 402 **CONCLUSION**

403 These findings suggest mental health problems experienced by people living with HIV are  
404 not necessarily uniform along the HIV care continuum and may require nuanced intervention  
405 approaches. With expanded HIV testing campaigns and UTT policies, tailored and targeted  
406 interventions for psychosocial support remain critical. Given the important and persistent role of  
407 anticipated or enacted stigma as a driver of poor mental health found in this study and  
408 throughout the literature,[16] continued attention is warranted on the implementation of  
409 evidence-based approaches to decrease stigma at the community and individual levels. Finally,  
410 more research is needed to understand the mental health needs of individuals who are returning  
411 to HIV care. Careful consideration of both the catalysts for psychological distress and resulting  
412 poor mental health at each step along the HIV care continuum are critical to ensuring the best  
413 possible outcomes for people living with HIV throughout their HIV care and treatment.

414

415

## 416 **Acknowledgements**

417 The authors wish to thank the participants who provided their insights and time to this study. We  
418 also thank the broader Rakai Health Sciences Program Social and Behavioral Studies team who  
419 supported this work.



421 **References**

- 422
- 423 [1] L. Dwyer-Lindgren *et al.*, "Mapping HIV prevalence in sub-Saharan Africa between  
424 2000 and 2017," *Nature*, vol. 570, no. 7760, pp. 189-193, Jun 2019, doi: 10.1038/s41586-  
425 019-1200-9.
- 426 [2] UNAIDS. "Understanding Fast-Track: Accelerating Action to End the AIDS Epidemic  
427 by 2030."  
428 [https://www.unaids.org/sites/default/files/media\\_asset/201506\\_JC2743\\_Understanding\\_F](https://www.unaids.org/sites/default/files/media_asset/201506_JC2743_Understanding_FastTrack_en.pdf)  
429 [astTrack\\_en.pdf](https://www.unaids.org/sites/default/files/media_asset/201506_JC2743_Understanding_FastTrack_en.pdf) (accessed March 29, 2021).
- 430 [3] UNAIDS. "Country Fact Sheet - Uganda."  
431 <http://www.unaids.org/en/regionscountries/countries/uganda> (accessed April 3, 2019).
- 432 [4] L. W. Chang *et al.*, "Heterogeneity of the HIV epidemic in agrarian, trading, and fishing  
433 communities in Rakai, Uganda: an observational epidemiological study," *Lancet HIV*,  
434 vol. 3, no. 8, pp. e388-e396, Aug 2016, doi: 10.1016/S2352-3018(16)30034-0.
- 435 [5] M. K. Grabowski *et al.*, "The role of viral introductions in sustaining community-based  
436 HIV epidemics in rural Uganda: evidence from spatial clustering, phylogenetics, and  
437 egocentric transmission models," *PLoS Med*, vol. 11, no. 3, p. e1001610, Mar 2014, doi:  
438 10.1371/journal.pmed.1001610.
- 439 [6] O. Ratmann *et al.*, "Quantifying HIV transmission flow between high-prevalence  
440 hotspots and surrounding communities: a population-based study in Rakai, Uganda,"  
441 *Lancet HIV*, vol. 7, no. 3, pp. e173-e183, Mar 2020, doi: 10.1016/S2352-3018(19)30378-  
442 9.
- 443 [7] M. Kate Grabowski *et al.*, "Migration, hotspots, and dispersal of HIV infection in Rakai,  
444 Uganda," *Nature Communications*, vol. 11, no. 1, p. 976, 2020/02/20 2020, doi:  
445 10.1038/s41467-020-14636-y.
- 446 [8] E. S. Kay, D. S. Batey, and M. J. Mugavero, "The HIV treatment cascade and care  
447 continuum: updates, goals, and recommendations for the future," *AIDS Res Ther*, vol. 13,  
448 p. 35, 2016, doi: 10.1186/s12981-016-0120-0.
- 449 [9] M. E. Herce, B. H. Chi, R. C. Liao, and C. J. Hoffmann, "Re-thinking Linkage to Care in  
450 the Era of Universal Test and Treat: Insights from Implementation and Behavioral  
451 Science for Achieving the Second 90," *AIDS Behav*, vol. 23, no. Suppl 2, pp. 120-128,  
452 Sep 2019, doi: 10.1007/s10461-019-02541-5.
- 453 [10] R. Brandt, "The mental health of people living with HIV/AIDS in Africa: a systematic  
454 review," *Afr J AIDS Res*, vol. 8, no. 2, pp. 123-33, Jun 2009, doi:  
455 10.2989/AJAR.2009.8.2.1.853.
- 456 [11] D. Chibanda, L. Benjamin, H. A. Weiss, and M. Abas, "Mental, neurological, and  
457 substance use disorders in people living with HIV/AIDS in low- and middle-income  
458 countries," *J Acquir Immune Defic Syndr*, vol. 67 Suppl 1, pp. S54-67, Sep 1 2014, doi:  
459 10.1097/QAI.0000000000000258.
- 460 [12] K. M. Narayan *et al.*, "HIV and noncommunicable disease comorbidities in the era of  
461 antiretroviral therapy: a vital agenda for research in low- and middle-income country  
462 settings," *J Acquir Immune Defic Syndr*, vol. 67 Suppl 1, pp. S2-7, Sep 1 2014, doi:  
463 10.1097/QAI.0000000000000267.
- 464 [13] A. M. Parcesepe *et al.*, "Mental health and HIV: research priorities related to the  
465 implementation and scale up of 'treat all' in sub-Saharan Africa," *J Virus Erad*, vol. 4, no.

- 466 Suppl 2, pp. 16-25, Nov 15 2018. [Online]. Available:  
467 <https://www.ncbi.nlm.nih.gov/pubmed/30515310>.
- 468 [14] R. H. Remien, M. J. Stirratt, N. Nguyen, R. N. Robbins, A. N. Pala, and C. A. Mellins,  
469 "Mental health and HIV/AIDS: the need for an integrated response," *AIDS*, vol. 33, no. 9,  
470 pp. 1411-1420, Jul 15 2019, doi: 10.1097/QAD.0000000000002227.
- 471 [15] Z. Shubber *et al.*, "Patient-Reported Barriers to Adherence to Antiretroviral Therapy: A  
472 Systematic Review and Meta-Analysis," *PLoS Med*, vol. 13, no. 11, p. e1002183, Nov  
473 2016, doi: 10.1371/journal.pmed.1002183.
- 474 [16] S. Rueda *et al.*, "Examining the associations between HIV-related stigma and health  
475 outcomes in people living with HIV/AIDS: a series of meta-analyses," *BMJ Open*, vol. 6,  
476 no. 7, p. e011453, Jul 13 2016, doi: 10.1136/bmjopen-2016-011453.
- 477 [17] L. A. Chambers *et al.*, "Stigma, HIV and health: a qualitative synthesis," *BMC Public  
478 Health*, vol. 15, p. 848, Sep 3 2015, doi: 10.1186/s12889-015-2197-0.
- 479 [18] R. Mayston, E. Kinyanda, N. Chishinga, M. Prince, and V. Patel, "Mental disorder and  
480 the outcome of HIV/AIDS in low-income and middle-income countries: a systematic  
481 review," *AIDS*, vol. 26 Suppl 2, pp. S117-35, Dec 2012, doi:  
482 10.1097/QAD.0b013e32835bde0f.
- 483 [19] N. Croome, M. Ahluwalia, L. D. Hughes, and M. Abas, "Patient-reported barriers and  
484 facilitators to antiretroviral adherence in sub-Saharan Africa," *AIDS*, vol. 31, no. 7, pp.  
485 995-1007, Apr 24 2017, doi: 10.1097/QAD.0000000000001416.
- 486 [20] S. Musisi, G. J. Wagner, B. Ghosh-Dastidar, N. Nakasujja, A. Dickens, and E. Okello,  
487 "Depression and sexual risk behaviour among clients about to start HIV antiretroviral  
488 therapy in Uganda," *Int J STD AIDS*, vol. 25, no. 2, pp. 130-7, Feb 2014, doi:  
489 10.1177/0956462413495186.
- 490 [21] G. J. Wagner, B. Ghosh-Dastidar, M. E. Slaughter, D. Akena, N. Nakasujja, and S.  
491 Musisi, "Changes in condom use during the first year of HIV treatment in Uganda and  
492 the relationship to depression," *Ann Behav Med*, vol. 48, no. 2, pp. 175-83, Oct 2014, doi:  
493 10.1007/s12160-013-9586-3.
- 494 [22] J. C. Kane *et al.*, "A scoping review of health-related stigma outcomes for high-burden  
495 diseases in low- and middle-income countries," *BMC Med*, vol. 17, no. 1, p. 17, Feb 15  
496 2019, doi: 10.1186/s12916-019-1250-8.
- 497 [23] R. R. Lilian, K. Rees, J. A. McIntyre, H. E. Struthers, and R. P. H. Peters, "Same-day  
498 antiretroviral therapy initiation for HIV-infected adults in South Africa: Analysis of  
499 routine data," *PLoS One*, vol. 15, no. 1, p. e0227572, 2020, doi:  
500 10.1371/journal.pone.0227572.
- 501 [24] B. Kerschberger, A. Boule, R. Kuwengwa, I. Ciglenecki, and M. Schomaker, "The  
502 Impact of Same-Day Antiretroviral Therapy Initiation under the WHO Treat-All Policy,"  
503 *Am J Epidemiol*, Feb 12 2021, doi: 10.1093/aje/kwab032.
- 504 [25] N. S. West, Poku, O., Murray, S., Hutton, H., Surkan, P., Kennedy, C.E., "The Mental  
505 Health of Adults Living with HIV in Sub-Saharan Africa Along the HIV Care  
506 Continuum: A Systematic Review of the Literature," Johns Hopkins Bloomberg School  
507 of Public Health, 2021.
- 508 [26] A. Kleinman, "Part Four: International health care planning from an ethnomedical  
509 perspective: Critique and recommendations for change," *Medical Anthropology*, vol. 2,  
510 no. 2, pp. 71-94, 1978.

- 511 [27] E. L. Davies *et al.*, "Reporting and conducting patient journey mapping research in  
512 healthcare: A scoping review," *J Adv Nurs*, vol. 79, no. 1, pp. 83-100, Jan 2023, doi:  
513 10.1111/jan.15479.
- 514 [28] M. J. Wawer *et al.*, "Control of sexually transmitted diseases for AIDS prevention in  
515 Uganda: a randomised community trial. Rakai Project Study Group," *Lancet*, vol. 353,  
516 no. 9152, pp. 525-35, Feb 13 1999, doi: 10.1016/s0140-6736(98)06439-3.
- 517 [29] N. S. West *et al.*, "'A Double Stress': The Mental Health Impacts of the COVID-19  
518 Pandemic Among People Living with HIV in Rakai, Uganda," *AIDS Behav*, vol. 26, no.  
519 1, pp. 261-265, Jan 2022, doi: 10.1007/s10461-021-03379-6.
- 520 [30] B. Crabtree, W. Miller, and (Eds.), *Doing Qualitative Reserach* London: Sage  
521 Publications, 1999.
- 522 [31] B. G. Glaser and A. L. Strauss, *The discovery of grounded theory : strategies for*  
523 *qualitative research* (Observations (Chicago, Ill.)). Chicago: Aldine Publishing (in eng),  
524 1967.
- 525 [32] S. Elo and H. Kyngas, "The qualitative content analysis process," *J Adv Nurs*, vol. 62, no.  
526 1, pp. 107-15, Apr 2008, doi: 10.1111/j.1365-2648.2007.04569.x.
- 527 [33] WHO. "Consolidated Guidelines On HIV Testing Services for a Changing Epidemic."  
528 <https://www.who.int/publications/i/item/978-92-4-155058-1> (accessed April 6, 2021).
- 529 [34] Uganda Ministry of Health, "National HIV Testing Services Policy and Implementation  
530 Guidelines," Kampala 2016.
- 531 [35] B. A. Bunda and I. V. Bassett, "Reaching the second 90: the strategies for linkage to care  
532 and antiretroviral therapy initiation," *Curr Opin HIV AIDS*, vol. 14, no. 6, pp. 494-502,  
533 Nov 2019, doi: 10.1097/COH.0000000000000579.
- 534 [36] S. M. Bulsara, M. L. Wainberg, and T. R. O. Newton-John, "Predictors of Adult  
535 Retention in HIV Care: A Systematic Review," *AIDS Behav*, vol. 22, no. 3, pp. 752-764,  
536 Mar 2018, doi: 10.1007/s10461-016-1644-y.
- 537 [37] C. Bernard, F. Dabis, and N. de Rekeneire, "Prevalence and factors associated with  
538 depression in people living with HIV in sub-Saharan Africa: A systematic review and  
539 meta-analysis," *PLoS One*, vol. 12, no. 8, p. e0181960, 2017, doi:  
540 10.1371/journal.pone.0181960.
- 541 [38] J. Wykowski, C. G. Kemp, J. Velloza, D. Rao, and P. K. Drain, "Associations Between  
542 Anxiety and Adherence to Antiretroviral Medications in Low- and Middle-Income  
543 Countries: A Systematic Review and Meta-analysis," *AIDS Behav*, vol. 23, no. 8, pp.  
544 2059-2071, Aug 2019, doi: 10.1007/s10461-018-02390-8.
- 545 [39] C. O. Cunningham, J. Buck, F. M. Shaw, L. S. Spiegel, M. Heo, and B. D. Agins,  
546 "Factors associated with returning to HIV care after a gap in care in New York State," *J*  
547 *Acquir Immune Defic Syndr*, vol. 66, no. 4, pp. 419-27, Aug 1 2014, doi:  
548 10.1097/QAI.0000000000000171.
- 549 [40] L. N. Mandell *et al.*, "Suicidal Ideation Among Adults Re-engaging in HIV Care in  
550 Argentina," *AIDS Behav*, vol. 23, no. 12, pp. 3427-3434, Dec 2019, doi: 10.1007/s10461-  
551 019-02526-4.
- 552 [41] M. Necho, M. Tsehay, and Y. Zenebe, "Suicidal ideation, attempt, and its associated  
553 factors among HIV/AIDS patients in Africa: a systematic review and meta-analysis  
554 study," *Int J Ment Health Syst*, vol. 15, no. 1, p. 13, Jan 23 2021, doi: 10.1186/s13033-  
555 021-00437-3.

- 556 [42] R. O. Shittu, B. A. Issa, G. T. Olanrewaju, A. O. Mahmoud, L. O. Odeigah, and A. G.  
557 Sule, "Social Determinants of Depression: Social Cohesion, Negative Life Events, and  
558 Depression Among People Living with HIV/Aids in Nigeria, West Africa," *Int J MCH*  
559 *AIDS*, vol. 2, no. 2, pp. 174-81, 2014. [Online]. Available:  
560 <https://www.ncbi.nlm.nih.gov/pubmed/27621970>.
- 561 [43] E. H. Gebremariam, M. M. Reta, Z. Nasir, and F. Z. Amdie, "Prevalence and Associated  
562 Factors of Suicidal Ideation and Attempt among People Living with HIV/AIDS at  
563 Zewditu Memorial Hospital, Addis Ababa, Ethiopia: A Cross-Sectional Study,"  
564 *Psychiatry J*, vol. 2017, p. 2301524, 2017, doi: 10.1155/2017/2301524.
- 565 [44] H. Bitew, G. Andargie, A. Tadesse, A. Belete, W. Fekadu, and T. Mekonen, "Suicidal  
566 Ideation, Attempt, and Determining Factors among HIV/AIDS Patients, Ethiopia,"  
567 *Depress Res Treat*, vol. 2016, p. 8913160, 2016, doi: 10.1155/2016/8913160.
- 568 [45] C. O. Egbe, P. S. Dakum, E. Ekong, B. A. Kohrt, J. G. Minto, and C. J. Ticao,  
569 "Depression, suicidality, and alcohol use disorder among people living with HIV/AIDS in  
570 Nigeria," *BMC Public Health*, vol. 17, no. 1, p. 542, Jun 2 2017, doi: 10.1186/s12889-  
571 017-4467-5.
- 572 [46] Uganda Ministry of Health, "Consolidated Guidelines for the Prevention and Treatment  
573 of HIV and AIDS in Uganda," Kampala, 2020.  
574
